# Supplementary material
Source: Copernicus journal article supplement (doi:10.5194/tc-20-3467-2026)
Supplement: Supplementary file 1 [file tc-20-3467-2026-supplement.pdf]

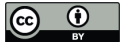

*Supplement of*

## **Airborne lidar and machine learning reveal decreased snow depth in burned forests**

**Arielle Koshkin and Adrienne M. Marshall**

*Correspondence to:* Arielle Koshkin ([arielle.koshkin@colorado.edu](mailto:arielle.koshkin@colorado.edu))

The copyright of individual parts of the supplement might differ from the article licence.

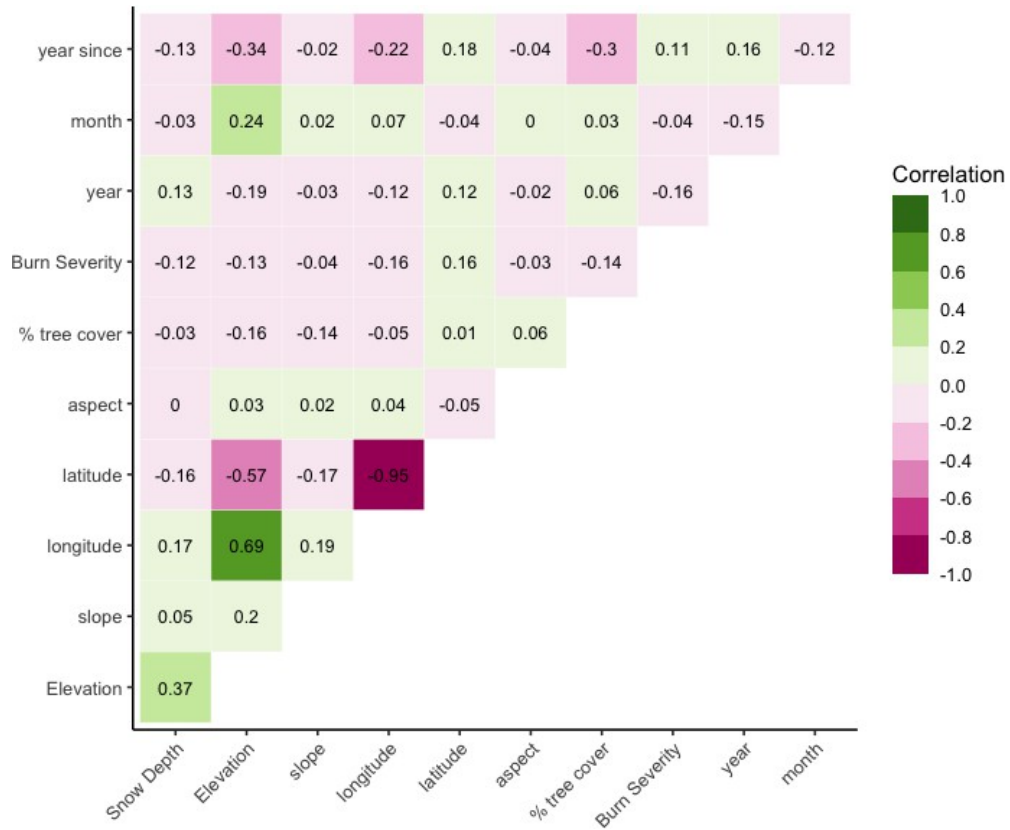

**Figure S1.** Correlation matrix for predictor variables used in the machine learning algorithm. X and Y coordinates show a strong correlation across the Sierra Nevada, but are not strongly correlated within individual basins.

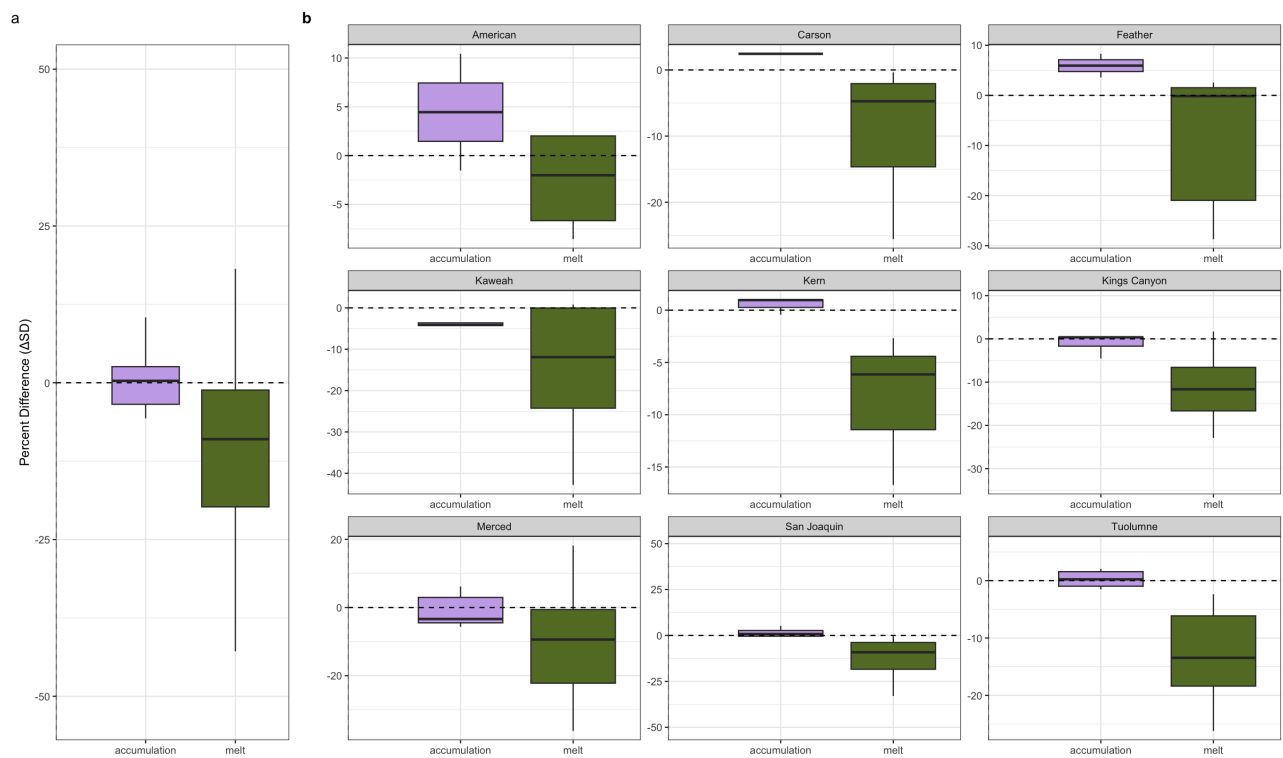

**Figure S2.** Basin-wide average of  $\Delta SD$  in accumulation and melt season snow distribution across Sierra Nevada basins. (a) Box plots showing the overall percent difference in snow distribution during the accumulation (before peak SWE) and melt (after peak SWE) in all basins. (b) Box plots of  $\Delta SD$  for each basin, separated by season (accumulation and melt).

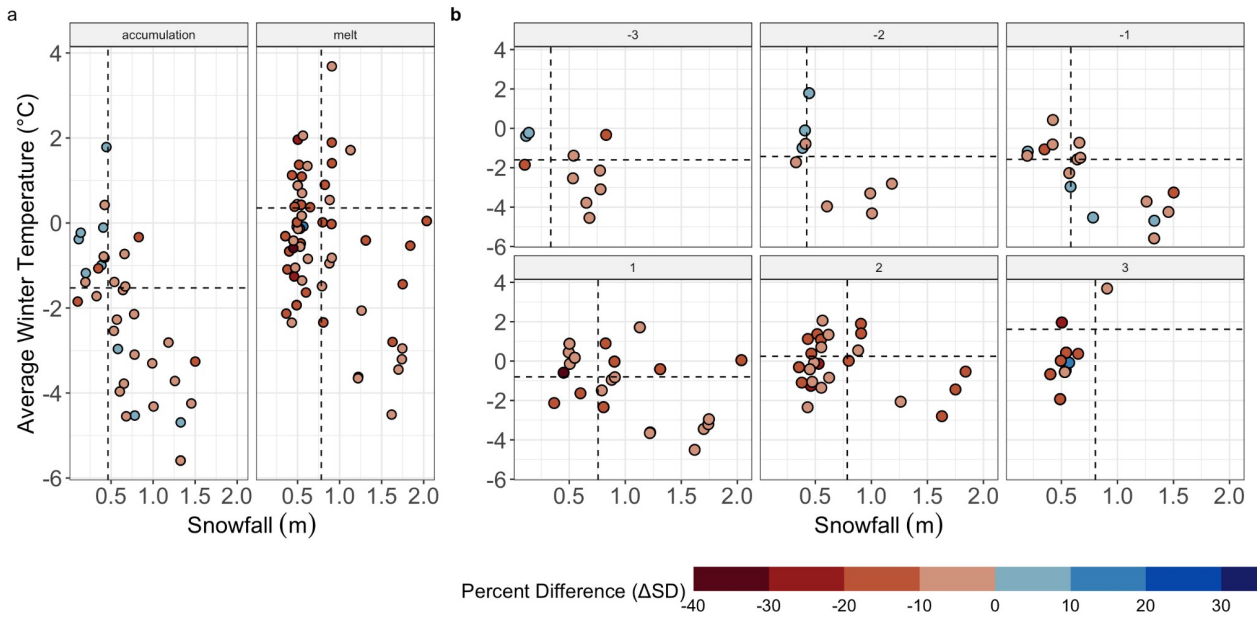

**Figure S3.** Basin-wide  $\Delta SD$  by average monthly temperatures and snowfall. Colored points indicate the average  $\Delta SD$  for each lidar acquisition. Dashed lines indicate average snowfall and temperature from 2020-2024 across the nine basins for the accumulation season (3 months before peak SWE) and melt (three months after peak SWE).

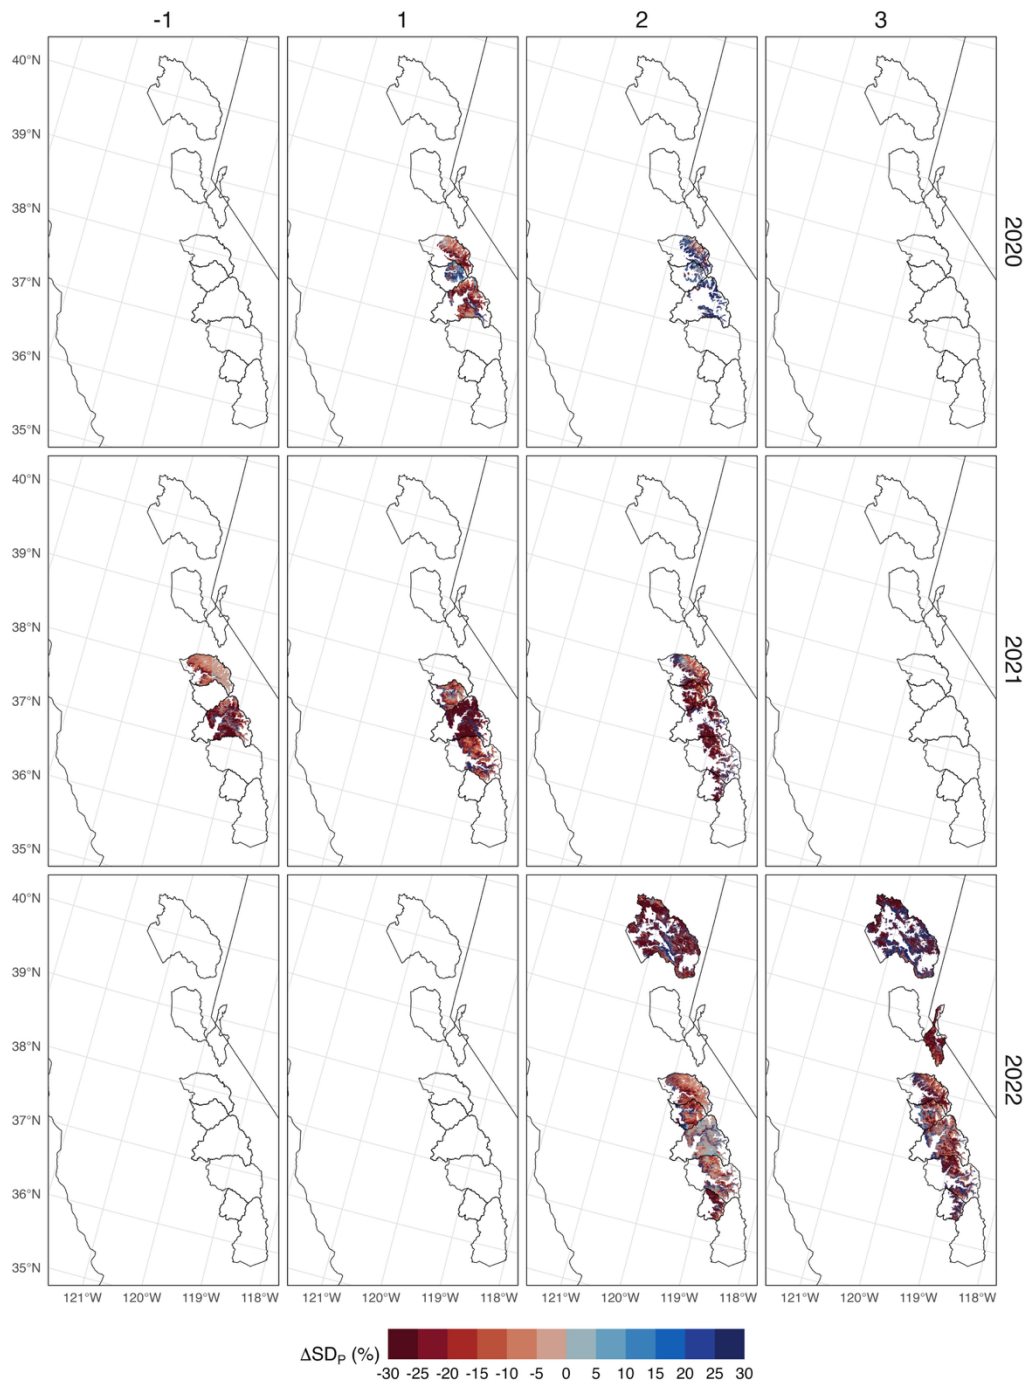

**Figure S4.** Spatial maps of  $\Delta SD$  for water years 2020, 2021, and 2022 (the years with the fewest lidar acquisitions) across the 9 study basins.

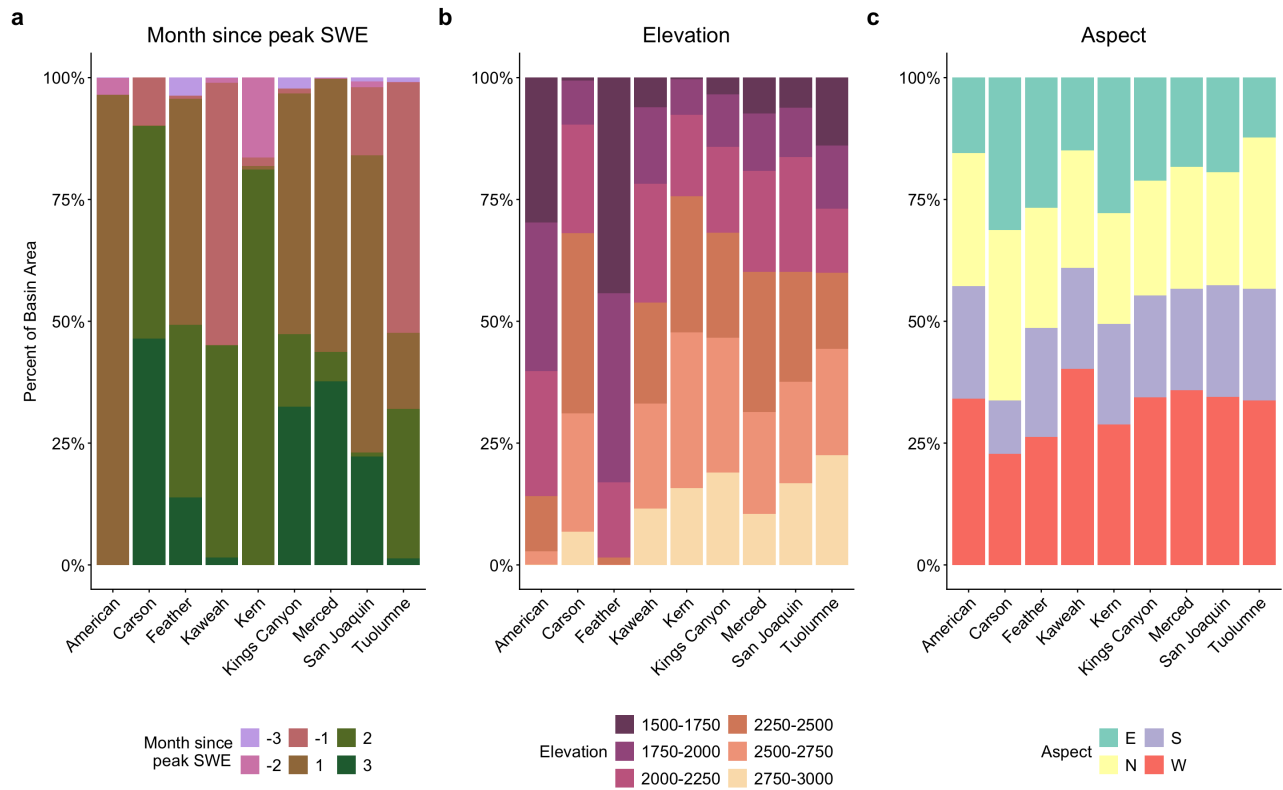

**Figure S5.** Characteristics of basin areas across Sierra Nevada watersheds. (a) Distribution of area flow by months since peak SWE for each basin. (b) Elevation distribution across basins. (c) Aspect distribution across basins.

**Table S1. Basin information**

| <b>Basin</b>        | ASO Basin Area (km <sup>2</sup> ) | Snow Zone Area (km <sup>2</sup> ) | % of the Basin in the snow zone | # of flights in each month since pSWE |           |           |           |           |           | Total # of flights |
|---------------------|-----------------------------------|-----------------------------------|---------------------------------|---------------------------------------|-----------|-----------|-----------|-----------|-----------|--------------------|
|                     |                                   |                                   |                                 | <b>-3</b>                             | <b>-2</b> | <b>-1</b> | <b>1</b>  | <b>2</b>  | <b>3</b>  |                    |
| <b>American</b>     | 3,268                             | 2,476                             | 76%                             | 1                                     | 1         | 0         | 4         | 0         | 0         | 6                  |
| <b>Carson</b>       | 1,476                             | 1,186                             | 80%                             | 0                                     | 0         | 1         | 2         | 2         | 4         | 9                  |
| <b>Feather</b>      | 8,367                             | 6,520                             | 78%                             | 1                                     | 0         | 1         | 3         | 2         | 3         | 10                 |
| <b>Kern</b>         | 1,451                             | 718                               | 50%                             | 0                                     | 1         | 2         | 1         | 1         | 1         | 6                  |
| <b>Kaweah</b>       | 4,171                             | 3,072                             | 74%                             | 1                                     | 2         | 2         | 2         | 4         | 3         | 14                 |
| <b>Kings Canyon</b> | 4,333                             | 3,025                             | 70%                             | 2                                     | 0         | 3         | 4         | 3         | 3         | 15                 |
| <b>Merced</b>       | 1,779                             | 1,363                             | 77%                             | 1                                     | 2         | 2         | 5         | 5         | 3         | 18                 |
| <b>San Joaquin</b>  | 4,241                             | 3,107                             | 73%                             | 2                                     | 1         | 3         | 4         | 5         | 3         | 18                 |
| <b>Tuolumne</b>     | 2,919                             | 2,371                             | 81%                             | 2                                     | 2         | 3         | 4         | 4         | 3         | 18                 |
| <b>Total</b>        | <b>32,009</b>                     | <b>23,844</b>                     | <b>75%</b>                      | <b>10</b>                             | <b>9</b>  | <b>17</b> | <b>29</b> | <b>26</b> | <b>23</b> | <b>114</b>         |
